# Supplementary material for: Quantifying the Effect of Metformin Treatment and Dose on Glycemic Control
Source: PubMed Central journal article supplement — Diabetes Care. 2012 Jan 16;35(2):446–54. doi: 10.2337/dc11-1465 (PMC3263873; doi:10.2337/dc11-1465), 2012-01-16
Supplement: supp_dc11-1465v111465_DC111465SupplementaryData.pdf [file supp_dc11-1465v111465_DC111465SupplementaryData.pdf]

SUPPLEMENTARY DATA

**Supplementary Figure 1.** Flow chart showing number of citations retrieved in searches and number of trials included in the review

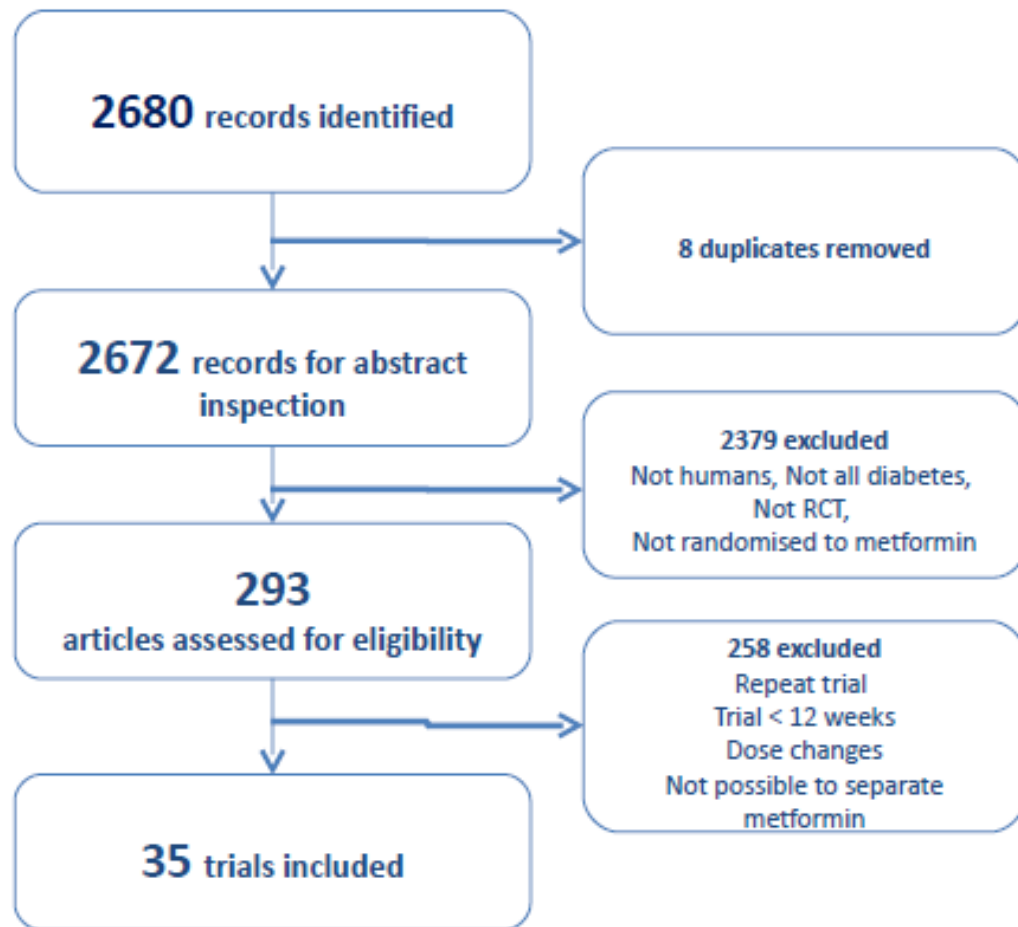

SUPPLEMENTARY DATA

**Supplementary Figure 2.** Relative risk of adverse events during trials of metformin treatment versus comparator (boxes) and pooled estimates across trials (diamonds) calculated by the Mantel-Haenszel method using a random effects model in trials of metformin monotherapy, metformin as add-on therapy to oral medication and metformin as add-on therapy to insulin. Horizontal bars and diamond widths denote 95% confidence intervals and box sizes indicate relative weight in the analysis.

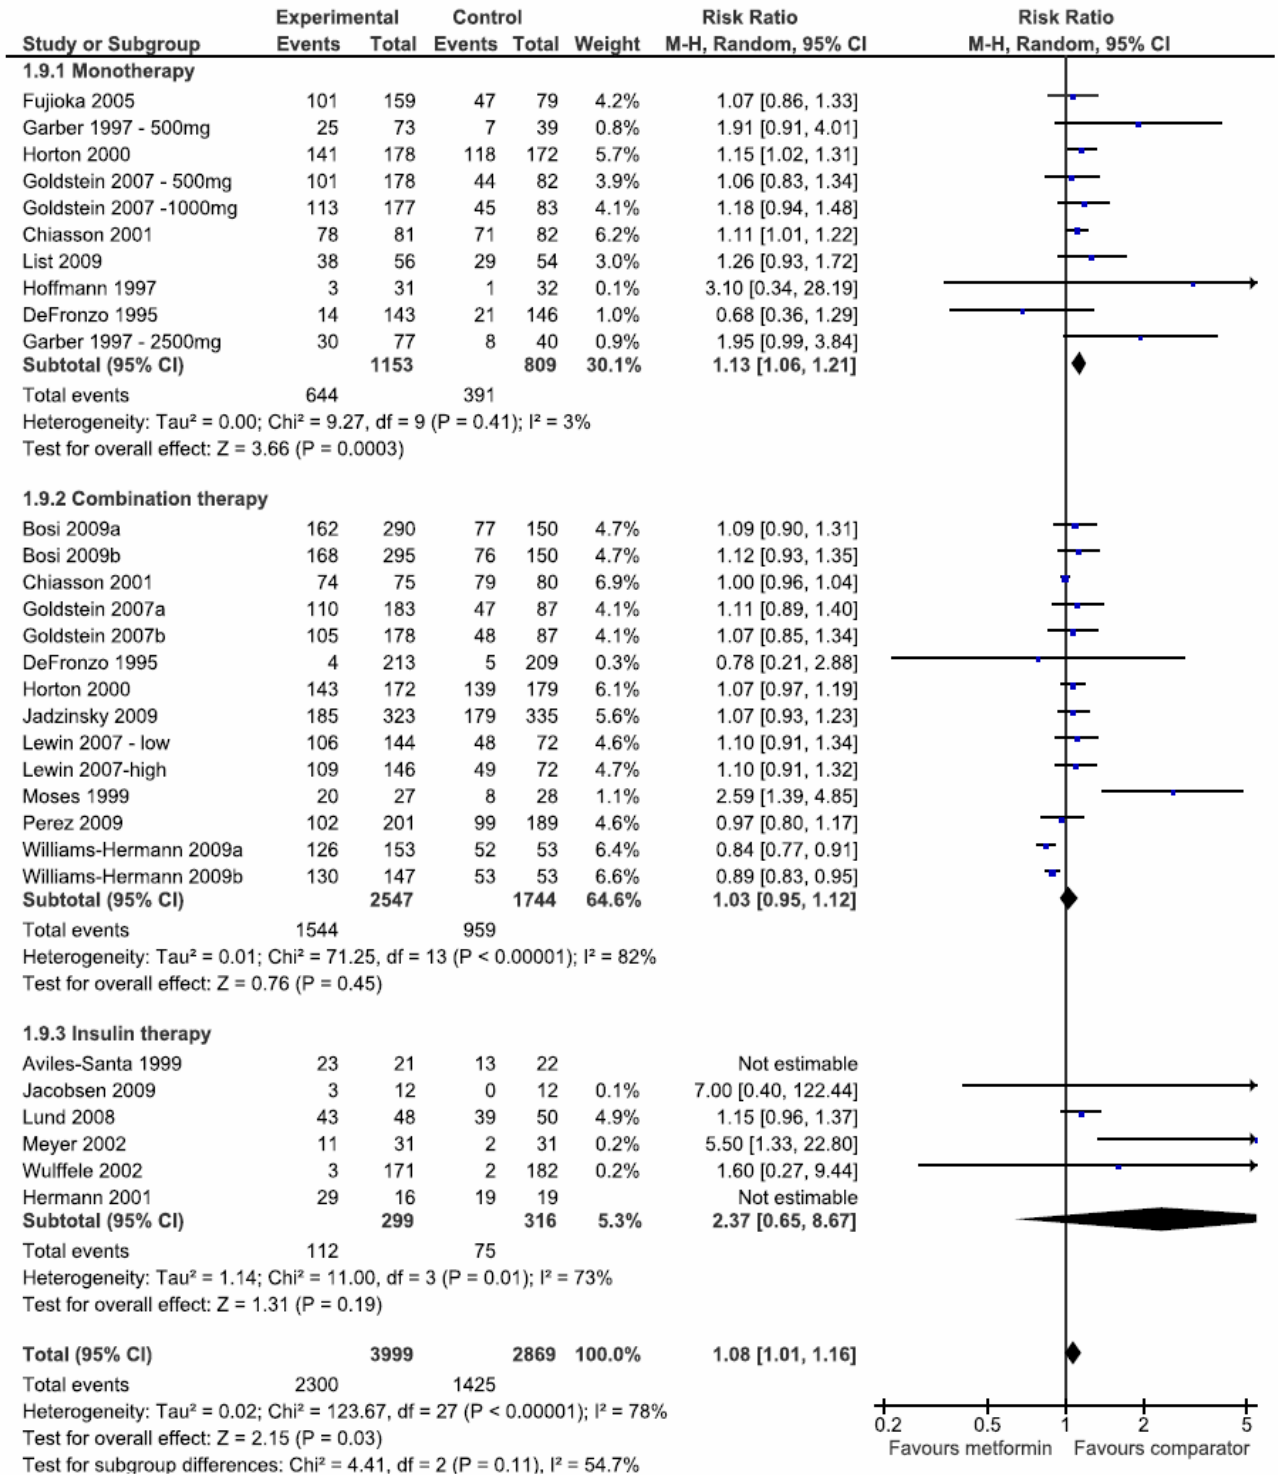

## SUPPLEMENTARY DATA

### References

- Avilés-Santa L, Sinding J, Raskin P. *Effects of metformin in patients with poorly controlled, insulin-treated type 2 diabetes mellitus. A randomized, double-blind, placebo-controlled trial.* Ann Intern Med. 1999 Aug 3;131(3):182-8.
- Bosi E, Dotta F, Jia Y, Goodman M. *Vildagliptin plus metformin combination therapy provides superior glycaemic control to individual monotherapy in treatment-naive patients with type 2 diabetes mellitus.* Diabetes Obes Metab. 2009 May;11(5):506-15.
- Chiasson JL, Naditch L; Miglitol Canadian University Investigator Group. *The synergistic effect of miglitol plus metformin combination therapy in the treatment of type 2 diabetes.* Diabetes Care. 2001 Jun;24(6):989-94.
- Damsbo P, Hermann LS, Vaag A, Hother-Nielsen O, Beck-Nielsen H. *Irreversibility of the defect in glycogen synthase activity in skeletal muscle from obese patients with NIDDM treated with diet and metformin.* Diabetes Care. 1998 Sep;21(9):1489-94.
- DeFronzo RA, Goodman AM. *Efficacy of metformin in patients with non-insulin-dependent diabetes mellitus. The Multicenter Metformin Study Group.* N Engl J Med. 1995 Aug 31;333(9):541-9.
- Derosa G, Maffioli P, Salvadeo SA, Ferrari I, Gravina A, Mereu R, Palumbo I, D'Angelo A, Cicero AF. *Direct comparison among oral hypoglycemic agents and their association with insulin resistance evaluated by euglycemic hyperinsulinemic clamp: the 60's study.* Metabolism. 2009 Aug;58(8):1059-66.
- Douek IF, Allen SE, Ewings P, Gale EA, Bingley PJ; Metformin Trial Group. *Continuing metformin when starting insulin in patients with Type 2 diabetes: a double-blind randomized placebo-controlled trial.* Diabet Med. 2005 May;22(5):634-40.
- Fujioka K, Brazg RL, Raz I, Bruce S, Joyal S, Swanink R, Pans M. *Efficacy, dose-response relationship and safety of once-daily extended-release metformin (Glucophage XR) in type 2 diabetic patients with inadequate glycaemic control despite prior treatment with diet and exercise: results from two double-blind, placebo-controlled studies.* Diabetes Obes Metab. 2005 Jan;7(1):28-39.
- Garber AJ, Duncan TG, Goodman AM, Mills DJ, Rohlf JL. *Efficacy of metformin in type II diabetes: results of a double-blind, placebo-controlled, dose-response trial.* Am J Med. 1997 Dec;103(6):491-7.
- Giugliano D, Quatraro A, Consoli G, Minei A, Ceriello A, De Rosa N, D'Onofrio F. *Metformin for obese, insulin-treated diabetic patients: improvement in glycaemic control and reduction of metabolic risk factors.* Eur J Clin Pharmacol. 1993;44(2):107-12.
- Goldstein BJ, Feinglos MN, Lunceford JK, Johnson J, Williams-Herman DE; Sitagliptin 036 Study Group. *Effect of initial combination therapy with sitagliptin, a dipeptidyl peptidase-4 inhibitor, and metformin on glycemic control in patients with type 2 diabetes.* Diabetes Care. 2007 Aug;30(8):1979-87.

## SUPPLEMENTARY DATA

Grant PJ. *The effects of high- and medium-dose metformin therapy on cardiovascular risk factors in patients with type II diabetes.* Diabetes Care. 1996 Jan;19(1):64-6.

Hällsten K, Virtanen KA, Lönnqvist F, Sipilä H, Oksanen A, Viljanen T, Rönnemaa T, Viikari J, Knuuti J, Nuutila P. *Rosiglitazone but Not Metformin Enhances Insulin- and Exercise-Stimulated Skeletal Muscle Glucose Uptake in Patients With Newly Diagnosed Type 2 Diabetes.* Diabetes. 2002 Dec;51(12):3479-85.

Hermann LS, Kalén J, Katzman P, Lager I, Nilsson A, Norrhamn O, Sartor G, Ugander L. *Long-term glycaemic improvement after addition of metformin to insulin in insulin-treated obese type 2 diabetes patients.* Diabetes Obes Metab. 2001 Dec;3(6):428-34.

Hoffmann J, Spengler M. *Efficacy of 24-week monotherapy with acarbose, metformin, or placebo in dietary-treated NIDDM patients: the Essen-II Study.* Am J Med. 1997 Dec;103(6):483-90.

Horton ES, Clinkingbeard C, Gatlin M, Foley J, Mallows S, Shen S. *Nateglinide alone and in combination with metformin improves glycemic control by reducing mealtime glucose levels in type 2 diabetes.* Diabetes Care. 2000 Nov;23(11):1660-5.

Iozzo P, Hallsten K, Oikonen V, Virtanen KA, Parkkola R, Kempainen J, Solin O, Lonqvist F, Ferrannini E, Knuuti J, Nuutila P. *Effects of metformin and rosiglitazone monotherapy on insulin-mediated hepatic glucose uptake and their relation to visceral fat in type 2 diabetes.* Diabetes Care. 2003 Jul;26(7):2069-74.

Jacobsen IB, Henriksen JE, Beck-Nielsen H. *The effect of metformin in overweight patients with type 1 diabetes and poor metabolic control.* Basic Clin Pharmacol Toxicol. 2009 Sep;105(3):145-9.

Jadzinsky M, Pfützner A, Paz-Pacheco E, Xu Z, Allen E, Chen R; CV181-039 Investigators. *Saxagliptin given in combination with metformin as initial therapy improves glycaemic control in patients with type 2 diabetes compared with either monotherapy: a randomized controlled trial.* Diabetes Obes Metab. 2009 Jun;11(6):611-22.

Khan AS, McLoughney CR, Ahmed AB. *The effect of metformin on blood glucose control in overweight patients with Type 1 diabetes.* Diabet Med. 2006 Oct;23(10):1079-84.

Lewin A, Lipetz R, Wu J, Schwartz S. *Comparison of extended-release metformin in combination with a sulfonylurea (glyburide) to sulfonylurea monotherapy in adult patients with type 2 diabetes: a multicenter, double-blind, randomized, controlled, phase III study.* Clin Ther. 2007 May;29(5):844-55.

List JF, Woo V, Morales E, Tang W, Fiedorek FT. *Sodium-glucose cotransport inhibition with dapagliflozin in type 2 diabetes.* Diabetes Care. 2009 Apr;32(4):650-7.

Lund SS, Tarnow L, Astrup AS, Hovind P, Jacobsen PK, Alibegovic AC, Parving I, Pietraszek L, Frandsen M, Rossing P, Parving HH, Vaag AA. *Effect of adjunct metformin treatment in patients with type-1 diabetes and persistent inadequate glycaemic control. A randomized study.* PLoS One. 2008;3(10):e3363.

## SUPPLEMENTARY DATA

Meyer L, Bohme P, Delbachian I, Lehert P, Cugnardey N, Drouin P, Guerci B. *The benefits of metformin therapy during continuous subcutaneous insulin infusion treatment of type 1 diabetic patients.* Diabetes Care. 2002 Dec;25(12):2153-8.

Moses R, Slobodniuk R, Boyages S, Colagiuri S, Kidson W, Carter J, Donnelly T, Moffitt P, Hopkins H. *Effect of repaglinide addition to metformin monotherapy on glycemic control in patients with type 2 diabetes.* Diabetes Care. 1999 Jan;22(1):119-24.

Natali A, Baldeweg S, Toschi E, Capaldo B, Barbaro D, Gastaldelli A, Yudkin JS, Ferrannini E. *Vascular effects of improving metabolic control with metformin or rosiglitazone in type 2 diabetes.* Diabetes Care. 2004 Jun;27(6):1349-57.

Perez A, Zhao Z, Jacks R, Spanheimer R. *Efficacy and safety of pioglitazone/metformin fixed-dose combination therapy compared with pioglitazone and metformin monotherapy in treating patients with T2DM.* Curr Med Res Opin. 2009 Dec;25(12):2915-23.

Ponssen HH, Elte JW, Lehert P, Schouten JP, Bets D. *Combined metformin and insulin therapy for patients with type 2 diabetes mellitus.* Clin Ther. 2000 Jun;22(6):709-18.

Robinson AC, Burke J, Robinson S, Johnston DG, Elkeles RS. *The effects of metformin on glycemic control and serum lipids in insulin-treated NIDDM patients with suboptimal metabolic control.* Diabetes Care. 1998 May;21(5):701-5.

Ryysy L, Yki-Järvinen H. *Improvement of glycemic control by 1 year of insulin therapy leads to a sustained decrease in sE-selectin concentrations in type 2 diabetes.* Diabetes Care. 2001 Mar;24(3):549-54.

Viljanen AP, Virtanen KA, Järvisalo MJ, Hällsten K, Parkkola R, Rönnemaa T, Lönnqvist F, Izzo P, Ferrannini E, Nuutila P. *Rosiglitazone treatment increases subcutaneous adipose tissue glucose uptake in parallel with perfusion in patients with type 2 diabetes: a double-blind, randomized study with metformin.* J Clin Endocrinol Metab. 2005 Dec;90(12):6523-8.

Williams-Herman D, Johnson J, Teng R, Luo E, Davies MJ, Kaufman KD, Goldstein BJ, Amatruda JM. *Efficacy and safety of initial combination therapy with sitagliptin and metformin in patients with type 2 diabetes: a 54-week study.* Curr Med Res Opin. 2009 Mar;25(3):569-83.

Wolever TMS, Assiff L, Basu T. et al. *Miglitol, an (alpha)-glucosidase inhibitor, prevents the metformin-induced fall in serum folate and vitamin B12 in subjects with type 2 diabetes.* Nutr Res. 2000;20(10):1447-56

Wulffélé MG, Kooy A, Lehert P, Bets D, Ogterop JC, Borger van der Burg B, Donker AJ, Stehouwer CD. *Combination of insulin and metformin in the treatment of type 2 diabetes.* Diabetes Care. 2002 Dec;25(12):2133-40.

## SUPPLEMENTARY DATA

Yki-Järvinen H, Ryysy L, Nikkilä K, Tulokas T, Vanamo R, Heikkilä M. *Comparison of bedtime insulin regimens in patients with type 2 diabetes mellitus. A randomized, controlled trial.* Ann Intern Med. 1999 Mar 2;130(5):389-96.
